# Supplementary material for: Elucidating the enhanced decomposition of alkyl hydroperoxides on oxygen vacancy rich TiO2−xsurfaces using DFT for polyethylene decomposition
Source: Royal Society of Chemistry journal article supplement (doi:10.1039/d2cp03768h), 2022-01-01
Supplement: d2cp03768h1.pdf [file d2cp03768h1.pdf]

## Supporting Information

# Elucidating the Enhanced Decomposition of Alkyl Hydroperoxides on Oxygen Vacancy Rich $\text{TiO}_{2-x}$ Surfaces using DFT for Polyethylene Decomposition

*Yong Jieh Lee,<sup>a</sup> Lutfi Kurnianditia Putri,<sup>a</sup> Boon-Junn Ng,<sup>a</sup> Lling-Lling Tan,<sup>a</sup> Ta Yeong Wu,<sup>a</sup> and Siang-Piao Chai<sup>\*a</sup>*

<sup>a</sup>Multidisciplinary Platform of Advanced Engineering, Chemical Engineering Discipline, School of Engineering, Monash University, Jalan Lagoon Selatan, 47500 Bandar Sunway, Selangor, Malaysia.

\*Author to whom correspondence should be addressed: [chai.siang.piao@monash.edu](mailto:chai.siang.piao@monash.edu)

## 1. Computational Methods

Density functional theory (DFT) calculations were performed using Vienna *ab initio* simulation package (VASP).<sup>1, 2</sup> A 3 x 3 surface slab supercell of TiO<sub>2</sub> and TiO<sub>2-x</sub> anatase were used for adsorption studies to ensure sufficient separation between adsorbates in adjacent supercells, thus preventing unintended adsorbate-adsorbate interactions. The lattice parameters of the surface slab were a = 10.210 Å, b = 11.328 Å, c = 29.353 Å with a slab thickness of ~8 Å. The {101} facet surface was chosen due to its prevalence on the anatase surface as shown in the Wulff construction,<sup>3</sup> and the subsurface oxygen vacancy position was used in the TiO<sub>2-x</sub> model due to its stability.<sup>4</sup> Due to the infeasibility of simulating a polyethylene hydroperoxide macromolecule with large number of atoms, sec-pentyl hydroperoxide was chosen as the model adsorbate, which sufficiently describes the nature of hydroperoxide functional group on the secondary position of the polymer backbone. A vacuum layer of ~20 Å perpendicular to the surface was also employed to prevent spurious interactions between the periodic slabs.

The exchange and correlation potential was described using Perdew-Burke-Ernzerhof (PBE) parameterization of generalized gradient approximation (GGA) level of theory.<sup>5</sup> The plane wave basis set cut-off energy was set at 520 eV, and pseudopotentials were resolved using projector augmented wave (PAW) frozen core model.<sup>6, 7</sup> The Brillouin zone was sampled with (3 x 3 x 1) Monkhorst-Pack scheme of kpoint mesh to carry out numerical integration in the reciprocal space.<sup>8</sup> Computation was performed with criterion of 10<sup>-5</sup> eV and 0.04 eV/Å for electronic self-consistent field calculations and Hellmann-Feynman forces respectively. The adsorption energy ( $E_{ads}$ ) was calculated according to Eq. 1.

$$E_{ads} = E_{(adsorbate - surface)} - E_{adsorbate} - E_{surface} \quad (1)$$

where  $E_{(adsorbate - surface)}$  is the total energy of sec-pentyl hydroperoxide adsorbed onto the  $TiO_2$  or  $TiO_{2-x}$  surface,  $E_{adsorbate}$  is the total energy of isolated sec-pentyl hydroperoxide, and  $E_{surface}$  is the total energy of the  $TiO_2$  or  $TiO_{2-x}$  relaxed surface slab. Bader charge analysis<sup>9</sup> was performed using Henkelman's code to integrate electron densities per unit atom basins.<sup>10</sup> Transition state and activation energy were also investigated using climbing image nudged elastic band (CI-NEB) method.<sup>11</sup>

Density of states calculation were converged with more stringent parameters.  $TiO_2$  and  $TiO_{2-x}$  surface structures were modelled with a 1 x 3 surface slab having a slab thickness of  $\sim 8$  Å and a vacuum layer of  $\sim 20$  Å, with anatase {101} facet and subsurface oxygen vacancy for  $TiO_{2-x}$ . The lattice parameters of the surface slab were  $a = 10.210$  Å,  $b = 3.776$  Å,  $c = 29.353$  Å. Exchange correlation potentials, basis sets and pseudopotentials were the same as before (*vide supra*). The Brillouin zone was sampled with (4 x 4 x 1) Monkhorst-Pack scheme of kpoint mesh to carry out numerical integration in the reciprocal space.<sup>8</sup> Computation was performed with criterion of  $10^{-6}$  eV and 0.01 eV/Å for spin polarized electronic self-consistent field calculations and Hellmann-Feynman forces respectively. Spurious self-interaction errors from Ti 3d shells were resolved utilizing on-site Coulombic interactions employed via the Hubbard  $U$  correction (GGA+U)<sup>12</sup>, following the Dudarev method of implementation<sup>13</sup>. Hubbard parameter of  $U = 4$ eV for Ti species was selected as it best describes and reproduces the  $d$  electron localized nature of the defect states in  $TiO_{2-x}$ <sup>14</sup>. Calculations of d-band center was implemented according to Eq. 2.<sup>15</sup>

$$\varepsilon_d = \frac{\int_{-\infty}^{\infty} n_d(\varepsilon) \varepsilon d\varepsilon}{\int_{-\infty}^{\infty} n_d(\varepsilon) d\varepsilon} \quad (2)$$

where  $n_d(\varepsilon)$  is the DOS of 3d orbitals of the surface Ti atoms at a given energy  $\varepsilon$ .

## **2. Experimental Methods**

### **2.1 Chemicals and Materials**

Titanium (IV) fluoride, polyethylene powder and sodium hydroxide were obtained from Sigma Aldrich. Titanium (III) chloride 30% solution and cyclohexane were obtained from Merck. Absolute ethanol was obtained from J. T. Baker. All chemicals were used as received without any further purification.

### **2.2 Photocatalyst Synthesis**

TiO<sub>2-x</sub> was synthesized via solvothermal method. Briefly, TiF<sub>4</sub> was dissolved in 5ml of absolute ethanol under vigorous stirring. Then, 2ml of 30% TiCl<sub>3</sub> solution was added and stirred for 30 minutes, resulting in a solution with a Ti<sup>4+</sup>:Ti<sup>3+</sup> molar ratio of 0.06. The solution was transferred into a Teflon-lined stainless steel autoclave and heated to 180°C for 24 hours under a ramping rate of 10°C min<sup>-1</sup>. The photocatalyst obtained was then washed with ethanol, 0.1M NaOH and DI water, then dried overnight in an oven. Pristine TiO<sub>2</sub> was synthesized by calcining the as-synthesized TiO<sub>2-x</sub> in a furnace at 400°C for 4 hours at 5°C min<sup>-1</sup> ramping rate.

### **2.3 Characterization**

Powder X-ray diffraction (XRD) was conducted using Bruker D8 Discover with Cu K $\alpha$  radiation ( $\lambda=1.54056$  Å). Energy dispersive X-ray spectroscopy (EDX) was performed using Hitachi SU8010 under 15kV accelerating voltage.

### **2.4 Photocatalytic Degradation of Polyethylene**

Photocatalyst-polyethylene nanocomposite films were prepared using a two-step casting method. In the first step, 150mg of polyethylene powder was added into 20ml of cyclohexane and heated to 70°C under stirring for 1 hour to achieve dissolution. 2ml aliquots were sampled and casted into a 4cm petri dish, then heated to 100°C for 20 minutes to evaporate the solvent, and

dried overnight in an oven at 40°C. In the second step, an appropriate amount of photocatalyst was added into the petri dish to match the amount of polyethylene casted. Then, 3ml of cyclohexane was added and ultrasonicated for 5 minutes at 80°C to disperse the photocatalyst within the polyethylene film. The nanocomposite film was then heated to 100°C for 20 mins to drive off the solvent, and dried overnight in an oven at 40°C.

Photocatalytic polyethylene degradation was performed using a 100W UV395nm LED lamp at an irradiation intensity of 10mW/cm<sup>2</sup> for the duration of 2 weeks. The degradation performance was quantified by the mass loss of polyethylene according to Eq. 3

$$Degradation (\%) = \frac{m_{PE, 0} - m_{PE}}{m_{PE, 0}} \times 100\% \quad (3)$$

### 3. DFT results

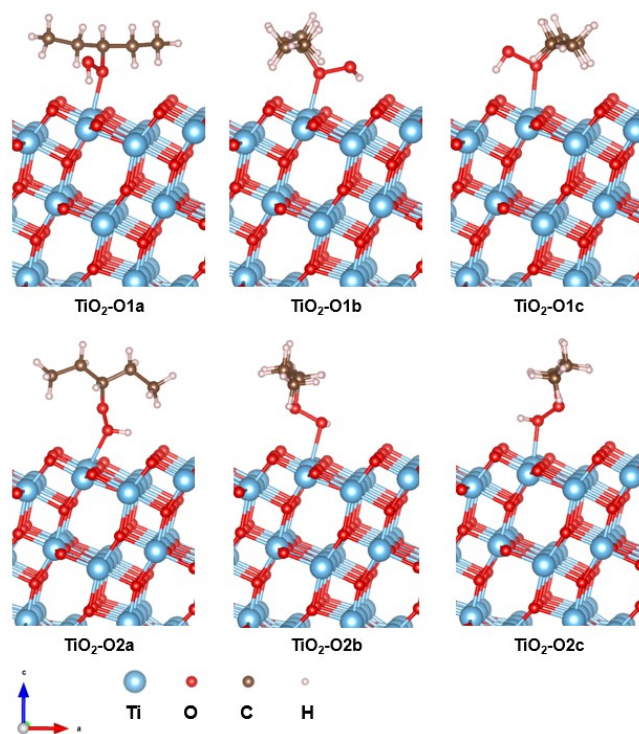

**Figure S1.** Configurations of sec-pentyl hydroperoxide adsorption onto  $\text{TiO}_2$  surface.

**Table S1.** Comparison of adsorption energies of sec-pentyl hydroperoxide adsorption onto  $\text{TiO}_2$ .

Adsorption energies reported are relative to the most stable adsorption configuration  $\text{TiO}_2\text{-O2a}$ .

| Adsorption Orientation                      | Adsorption Energy, $E_{\text{ads}}$ (eV) |
|---------------------------------------------|------------------------------------------|
| $\text{TiO}_2\text{-O1a}$                   | 0.2811                                   |
| $\text{TiO}_2\text{-O1b}$                   | 0.1225                                   |
| $\text{TiO}_2\text{-O1c}$                   | 0.2425                                   |
| <b><math>\text{TiO}_2\text{-O2a}</math></b> | <b>0.0000</b>                            |
| $\text{TiO}_2\text{-O2b}$                   | 0.4479                                   |
| $\text{TiO}_2\text{-O2c}$                   | 0.2213                                   |

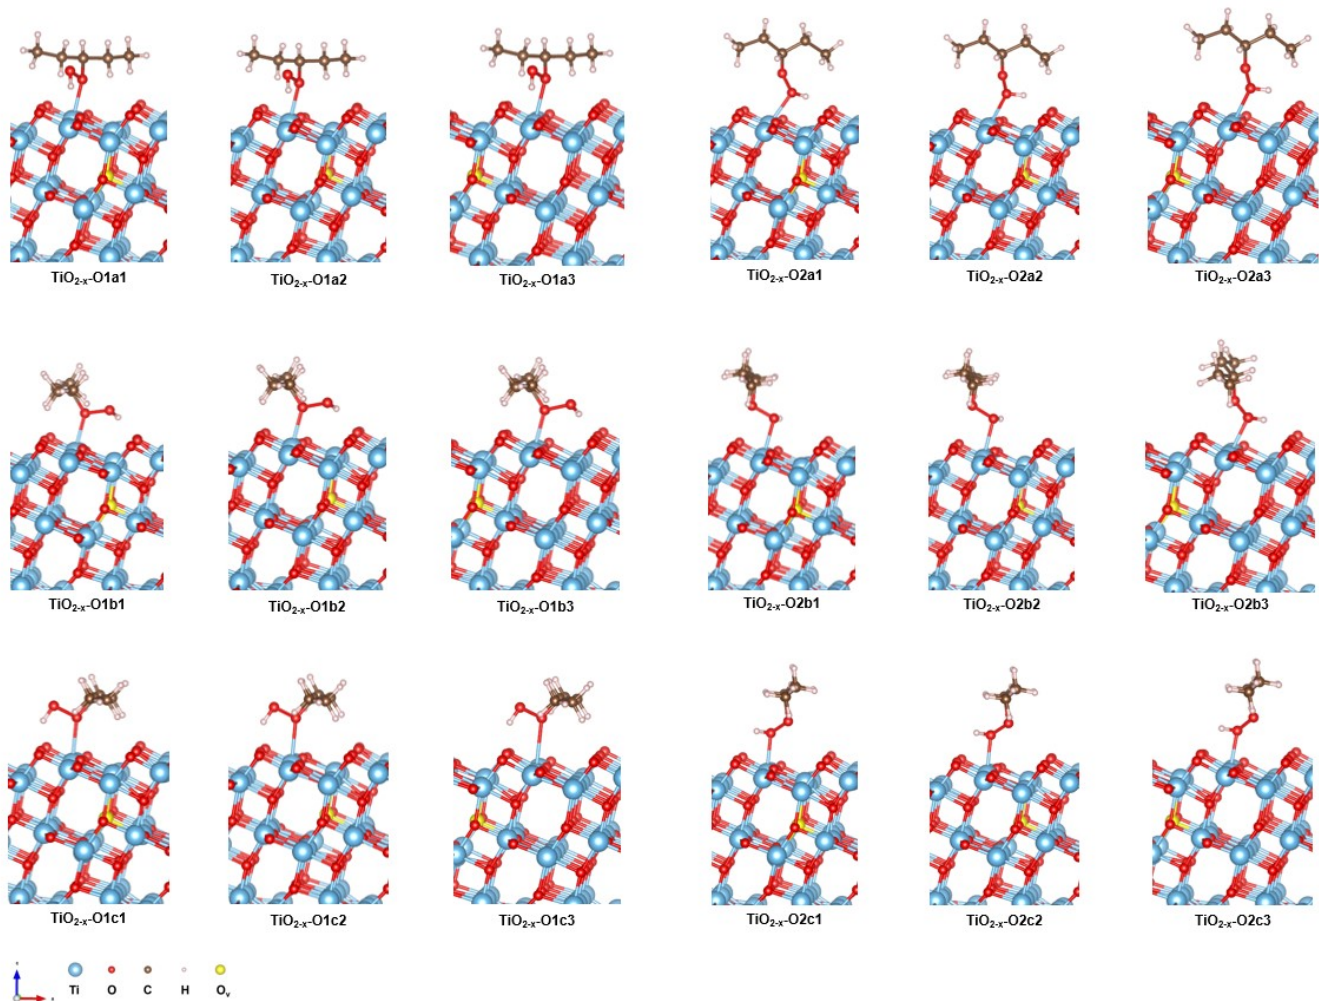

**Figure S2.** Configurations of sec-pentyl hydroperoxide adsorption onto  $\text{TiO}_{2-x}$  surface.

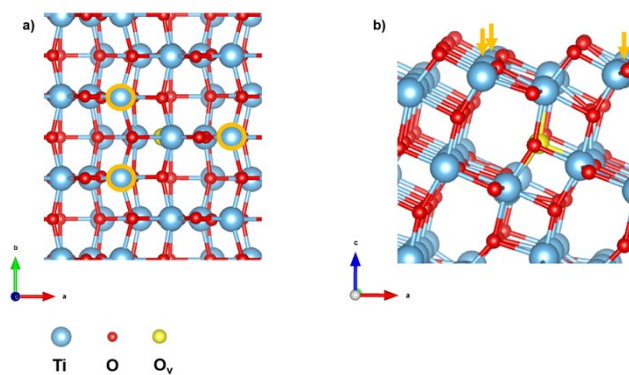

**Figure S3.** a) top view and b) side view of unique adsorption active sites on  $\text{TiO}_{2-x}$  surface. Orange circle and arrows depict the non-symmetrically equivalent undercoordinated adsorption sites.

**Table S2.** Comparison of adsorption energies of sec-pentyl hydroperoxide adsorption onto  $\text{TiO}_{2-x}$ . Adsorption energies reported are relative to the most stable adsorption configuration  $\text{TiO}_{2-x}$ -O2a1.

| Adsorption Orientation                    | Adsorption Energy, $E_{\text{ads}}$ (eV) |
|-------------------------------------------|------------------------------------------|
| $\text{TiO}_{2-x}$ -O1a1                  | 0.2776                                   |
| $\text{TiO}_{2-x}$ -O1a2                  | 0.3319                                   |
| $\text{TiO}_{2-x}$ -O1a3                  | 0.5321                                   |
| $\text{TiO}_{2-x}$ -O1b1                  | 0.1097                                   |
| $\text{TiO}_{2-x}$ -O1b2                  | 0.2310                                   |
| $\text{TiO}_{2-x}$ -O1b3                  | 0.3476                                   |
| $\text{TiO}_{2-x}$ -O1c1                  | 0.2903                                   |
| $\text{TiO}_{2-x}$ -O1c2                  | 0.2645                                   |
| $\text{TiO}_{2-x}$ -O1c3                  | 0.4355                                   |
| <b><math>\text{TiO}_{2-x}</math>-O2a1</b> | <b>0.0000</b>                            |
| $\text{TiO}_{2-x}$ -O2a2                  | 0.0623                                   |
| $\text{TiO}_{2-x}$ -O2a3                  | 0.1345                                   |
| $\text{TiO}_{2-x}$ -O2b1                  | 0.3603                                   |
| $\text{TiO}_{2-x}$ -O2b2                  | 0.3656                                   |
| $\text{TiO}_{2-x}$ -O2b3                  | 0.1625                                   |
| $\text{TiO}_{2-x}$ -O2c1                  | 0.2323                                   |
| $\text{TiO}_{2-x}$ -O2c2                  | 0.2656                                   |
| $\text{TiO}_{2-x}$ -O2c3                  | 0.3805                                   |



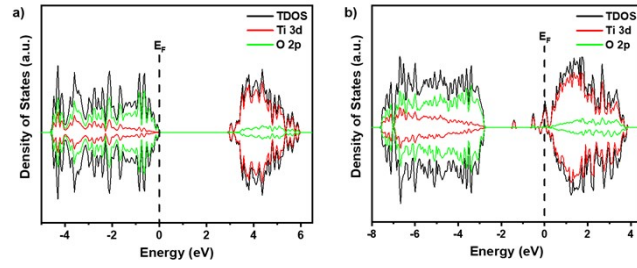

**Figure S4.** Density of states of a) TiO<sub>2</sub> and b) TiO<sub>2-x</sub>.

## REFERENCES

- (1) Kresse, G.; Furthmüller, J. Efficient iterative schemes for ab initio total-energy calculations using a plane-wave basis set. *Physical review B* **1996**, *54* (16), 11169.
- (2) Kresse, G.; Hafner, J. Ab initio molecular-dynamics simulation of the liquid-metal–amorphous-semiconductor transition in germanium. *Physical Review B* **1994**, *49* (20), 14251.
- (3) Chen, W.; Kuang, Q.; Wang, Q.; Xie, Z. Engineering a high energy surface of anatase TiO<sub>2</sub> crystals towards enhanced performance for energy conversion and environmental applications. *RSC Adv.* **2015**, *5* (26), 20396-20409, 10.1039/C5RA00344J. DOI: 10.1039/C5RA00344J.
- (4) Cheng, H.; Selloni, A. Surface and subsurface oxygen vacancies in anatase TiO<sub>2</sub> and differences with rutile. *Phys. Rev. B* **2009**, *79* (9), 092101. DOI: 10.1103/PhysRevB.79.092101.
- (5) Perdew, J. P.; Burke, K.; Ernzerhof, M. Generalized gradient approximation made simple. *Physical review letters* **1996**, *77* (18), 3865.
- (6) Blöchl, P. E. Projector augmented-wave method. *Phys. Rev. B* **1994**, *50* (24), 17953-17979. DOI: 10.1103/PhysRevB.50.17953.
- (7) Kresse, G.; Joubert, D. From ultrasoft pseudopotentials to the projector augmented-wave method. *Phys. Rev. B* **1999**, *59* (3), 1758-1775. DOI: 10.1103/PhysRevB.59.1758.
- (8) Monkhorst, H. J.; Pack, J. D. Special points for Brillouin-zone integrations. *Phys. Rev. B* **1976**, *13* (12), 5188-5192. DOI: 10.1103/PhysRevB.13.5188.
- (9) Bader, R. F. Atoms in molecules. *Acc. Chem. Res.* **1985**, *18* (1), 9-15.
- (10) Henkelman, G.; Arnaldsson, A.; Jónsson, H. A fast and robust algorithm for Bader decomposition of charge density. *Comput. Mater. Sci.* **2006**, *36* (3), 354-360. DOI: 10.1016/j.commatsci.2005.04.010.

- (11) Henkelman, G.; Uberuaga, B. P.; Jónsson, H. A climbing image nudged elastic band method for finding saddle points and minimum energy paths. *J. Chem. Phys.* **2000**, *113* (22), 9901-9904. DOI: 10.1063/1.1329672.
- (12) Elahifard, M.; Sadrian, M. R.; Mirzanejad, A.; Behjatmanesh-Ardakani, R.; Ahmadvand, S. Dispersion of defects in TiO<sub>2</sub> semiconductor: Oxygen vacancies in the bulk and surface of rutile and anatase. *Catalysts* **2020**, *10* (4), 397.
- (13) Dudarev, S. L.; Botton, G. A.; Savrasov, S. Y.; Humphreys, C. J.; Sutton, A. P. Electron-energy-loss spectra and the structural stability of nickel oxide: An LSDA+U study. *Phys. Rev. B* **1998**, *57* (3), 1505-1509. DOI: 10.1103/PhysRevB.57.1505.
- (14) Linh, N. H.; Nguyen, T. Q.; Diño, W. A.; Kasai, H. Effect of oxygen vacancy on the adsorption of O<sub>2</sub> on anatase TiO<sub>2</sub>(001): A DFT-based study. *Surf. Sci.* **2015**, *633*, 38-45. DOI: 10.1016/j.susc.2014.11.015.
- (15) Hammer, B.; Nørskov, J. K. Electronic factors determining the reactivity of metal surfaces. *Surf. Sci.* **1995**, *343* (3), 211-220. DOI: 10.1016/0039-6028(96)80007-0.
